# Supplementary material for: Protease activities of vaginal Porphyromonas species disrupt coagulation and extracellular matrix in the cervicovaginal niche
Source: PubMed Central journal article supplement (PMC8861167; doi:10.1038/s41522-022-00270-7), 2022-02-21
Supplement: 41522_2022_270_MOESM1_ESM.pdf [file 41522_2022_270_MOESM1_ESM.pdf]

## Supplementary Information

### Supplementary Note

#### **Vaginal *Porphyromonas* species do not encode gingipain orthologs**

Given the gingipain-like proteolytic activity observed in *P. asaccharolytica* and *P. uenonis* (Figures 1–2), we sought to confirm an earlier report that these organisms do not encode gingipain orthologs<sup>1</sup>. Using BLASTP, gingipain protein sequences (RgpA, RgpB, Kgp) were queried against *P. asaccharolytica* and *P. uenonis* genomes (Supplementary Figure 1A), yielding zero hits in *P. asaccharolytica* and two hits in each *P. uenonis* 23387 genome (IMG Genome ID 2585427891 and 2528311143); of note, these *P. uenonis* genomes were not queried in the previous analysis<sup>1</sup>. No BLASTP hits were identified in *P. uenonis* 60-3 as previously reported<sup>1</sup>. One hit resulted from the Kgp BLAST search only (Supplementary Table 3; L215DRAFT\_00230/JCM13868DRAFT\_00677; 27% sequence identity) and the other hit resulted from both the Kgp and RgpA BLAST queries (Supplementary Table 3; L215DRAFT\_00128/JCM13868DRAFT\_01423; 26–27% sequence identity). We further considered whether secreted proteases in *P. asaccharolytica* and *P. uenonis* share protein domains with gingipains. Evaluation of protein families (Pfams) in the gingipains revealed four conserved protein family (Pfam) domains, with RgpB containing one additional Pfam not found in RgpA or Kgp (Supplementary Table 4). All five Pfams were searched against all available genomes of *P. asaccharolytica* and *P. uenonis* to identify proteins containing gingipain Pfams (Supplementary Figure 1A). The peptidase C25 family (PF01364) search resulted in one hit in each of the genomes queried, while the cleaved adhesin domain (PF07675) returned hits in all *P. uenonis* strains, but none in *P. asaccharolytica* (Supplementary Table 4). To determine whether any hits from the BLAST search (Supplementary Table 3) and Pfam search (Supplementary Table 4) are gingipain orthologs, we performed a reciprocal BLASTP search against *P. gingivalis* (Supplementary Figure 1A). When the C25 peptidase-containing proteins identified in the Pfam search against *P. asaccharolytica* (Poras\_0230) and *P. uenonis* (L215DRAFT\_00971) were queried against *P. gingivalis* using BLASTP, PGN\_0022 emerged as the only significant hit with 36–37% identity and 97% query coverage (Supplementary Table 5). Since PGN\_0022 has been characterized as PorU, the type 9 secretion sortase enzyme in *P. gingivalis*<sup>2</sup>, the C25 peptidase-containing proteins identified in *P. asaccharolytica* and *P. uenonis* are likely to function as PorU orthologs rather than gingipains. Querying the cleaved adhesin domain-containing proteins from *P. uenonis* against *P. gingivalis* revealed two uncharacterized proteins: PGN\_1611 and PGN\_1733 as the top BLASTP hits (Supplementary Table 5). The Lys-gingipain (Kgp) was identified as the fourth hit from both *P. uenonis* cleaved adhesin domain-containing protein BLASTP searches (Supplementary Table 5), but the percent identity and coverage are restricted to the shared Pfam. Furthermore, results from multiple sequence alignments with the *P. gingivalis* gingipains showed  $\leq 20\%$  identity for all *P. asaccharolytica* and *P. uenonis* sequences. In summary, since all BLASTP alignments were less than 200 residues, full length alignments of query and subject sequences were  $\leq 20\%$ , our Pfam search did not identify *P. asaccharolytica* or *P. uenonis* proteins that appeared to be gingipains, and reciprocal BLASTP searches did not return *P. gingivalis* gingipains as top hits, we concluded that these vaginal *Porphyromonas* species do not encode gingipain orthologs.

## Supplementary References

- 1 O'Flynn, C. *et al.* Comparative Genomics of the Genus *Porphyromonas* Identifies Adaptations for Heme Synthesis within the Prevalent Canine Oral Species *Porphyromonas gingivalis*. *Genome Biol Evol* **7**, 3397-3413, doi:10.1093/gbe/evv220 (2015).
- 2 Gorasia, D. G. *et al.* *Porphyromonas gingivalis* Type IX Secretion Substrates Are Cleaved and Modified by a Sortase-Like Mechanism. *PLoS Pathog* **11**, e1005152, doi:10.1371/journal.ppat.1005152 (2015).

## Supplementary Figures

a.

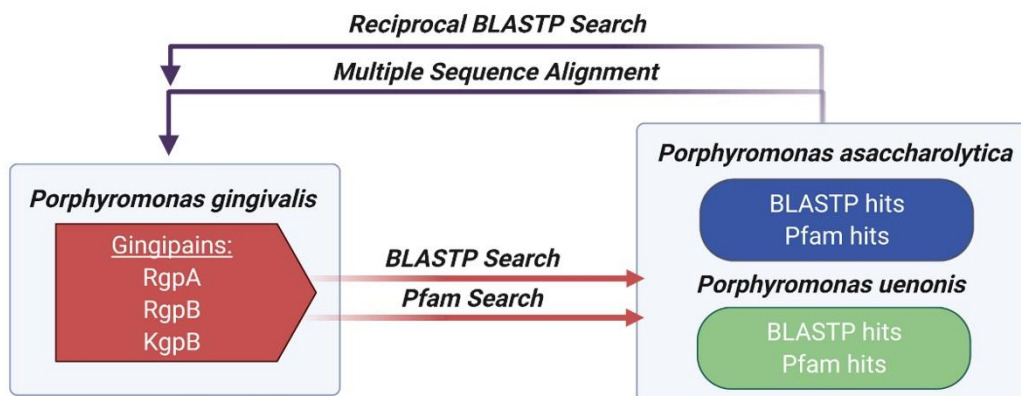

b.

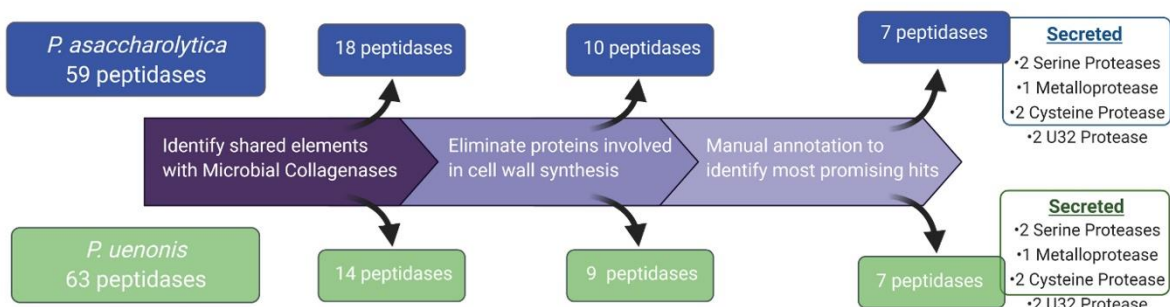

**Supplementary Figure 1. Schematic of bioinformatics approaches.** (a) Gingipain amino acid sequences for RgpA, RgpB and KgpB were used in BLASTP and Pfam searches against *P. asaccharolytica* and *P. uenonis* to search for gingipain orthologs. Resulting hits were subject to a reciprocal BLASTP search against *P. gingivalis* and a multiple sequence alignment with each gingipain. (b) Identification of candidate collagenases in *P. asaccharolytica* and *P. uenonis*. The MEROPS database was searched for all peptidases in *P. asaccharolytica* and *P. uenonis*. *Porphyromonas* peptidases were cross-referenced against protein annotation identifiers found in known and predicted microbial collagenases (BRENDA enzyme number: EC3.4.24.3). Candidate collagenases were explored in InterPro and UniProt to eliminate proteins involved in cell wall synthesis and identify the most promising hits. Images were prepared using BioRender.com.

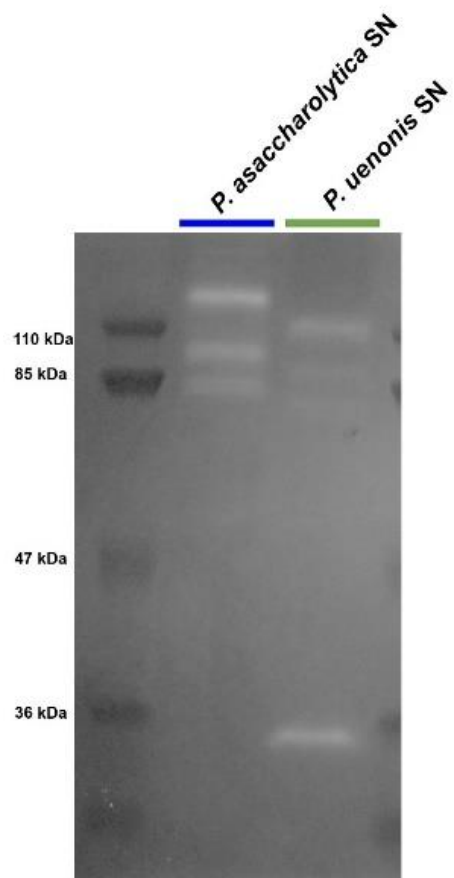

**Supplementary Figure 2. Gelatin zymography of *P. asaccharolytica* and *P. uenonis* cell-free supernatants.** Non-denaturing SDS-PAGE gelatin (type I collagen) zymogram loaded with 40  $\mu$ g per well of *P. asaccharolytica* or *P. uenonis* supernatant. Zones of clearing were observed in Coomassie-stained gels after gel renaturing and enzyme activation. Representative zymogram from three independent experiments.

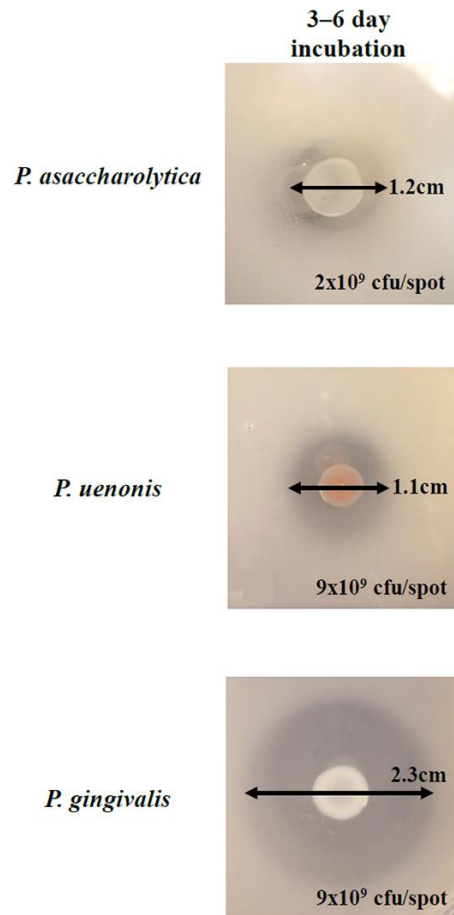

**Supplementary Figure 3. Casein degradation ability of *P. asaccharolytica*, *P. uenonis* and *P. gingivalis*.** Bacterial cell suspensions were spotted onto casein agar plates. Zones of clearing indicating casein degradation were measured after incubation for 3 or 6 days at designated doses of bacteria.

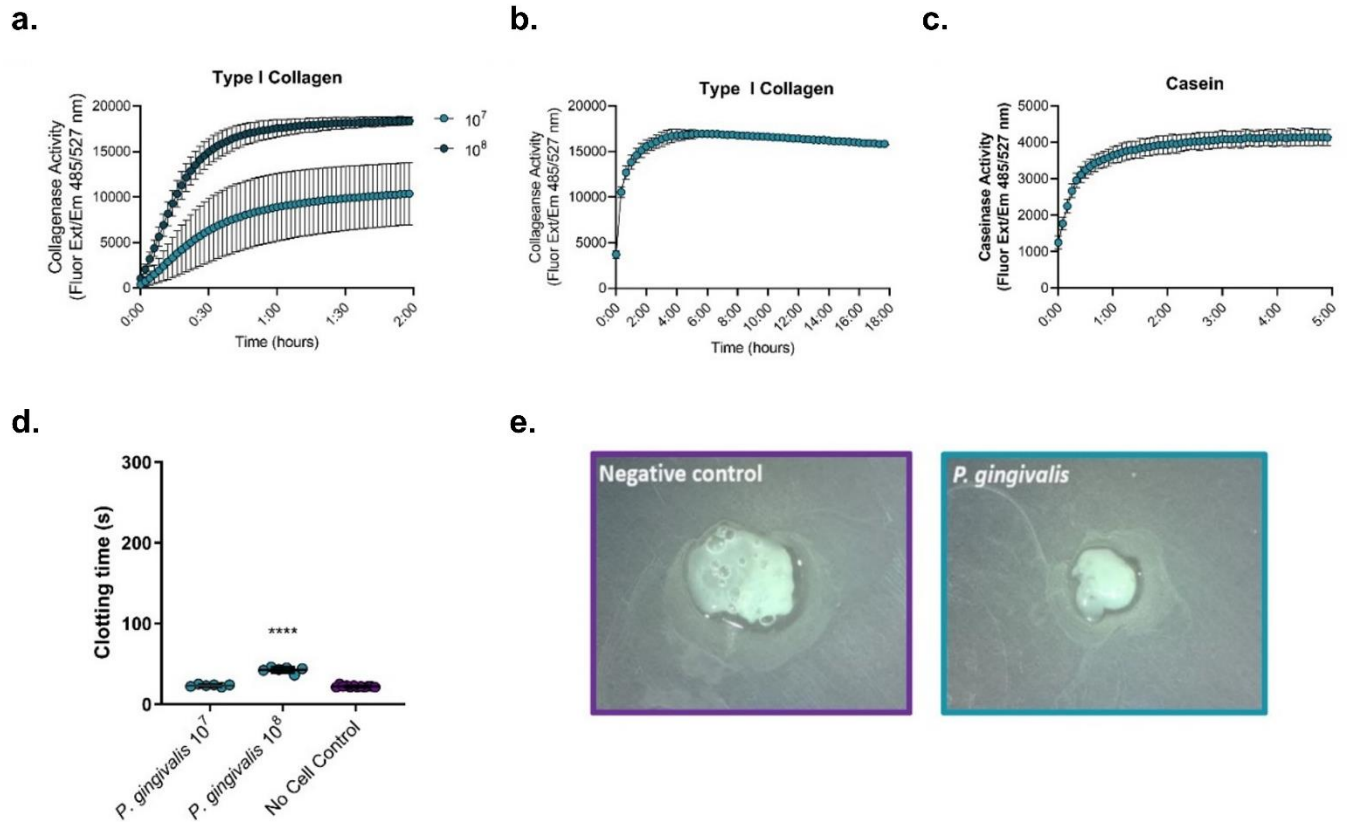

**Supplementary Figure 4. Protease activity of *P. gingivalis*.** (a) Cell suspensions of *P. gingivalis* at  $10^7$  or  $10^8$  CFU/reaction were incubated with fluorophore-conjugated type I collagen. Results are presented as mean  $\pm$  standard error from two independent experiments performed in technical triplicate or quadruplicate. Collagen degradation was measured by detecting the increase in fluorescence over a two-hour time course. (b) Cell-free supernatants of *P. gingivalis* were incubated with fluorophore-conjugated type I collagen over an 18-hour time course. Results are presented as mean  $\pm$  standard error from two independent experiments performed in technical triplicate. (c) Cell-free supernatants of *P. gingivalis* were incubated with fluorophore-conjugated casein over a five-hour time course; fluorescence was measured every ten minutes. Results are presented as mean  $\pm$  standard error from two independent experiments performed in technical triplicate. (d) Time to fibrin clot formation after thrombin addition following pre-incubation of citrated plasma with no cell controls or cell suspensions of *P. gingivalis* at  $10^7$  or  $10^8$  CFU/reaction. Experiments were performed in technical duplicate and results are presented as mean  $\pm$  SEM from two independent experiments. (e) Endpoint qualitative evaluation of fibrin clots (>30 minutes) after clotting time assay from no cell control or *P. gingivalis* cell suspension ( $10^8$  CFU/mL).

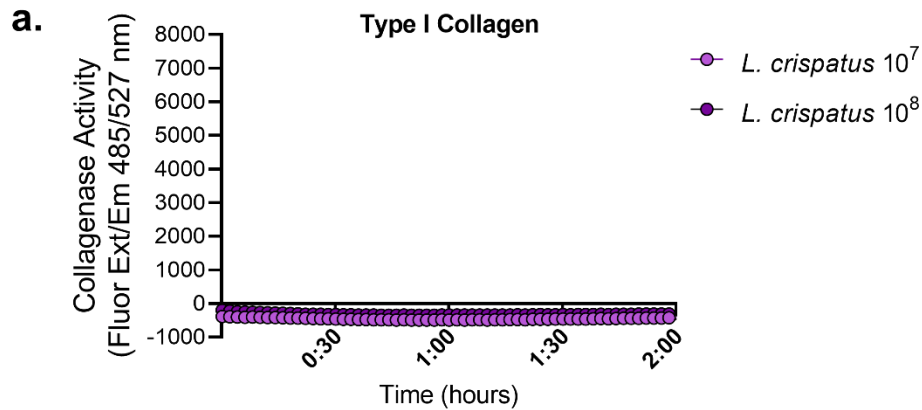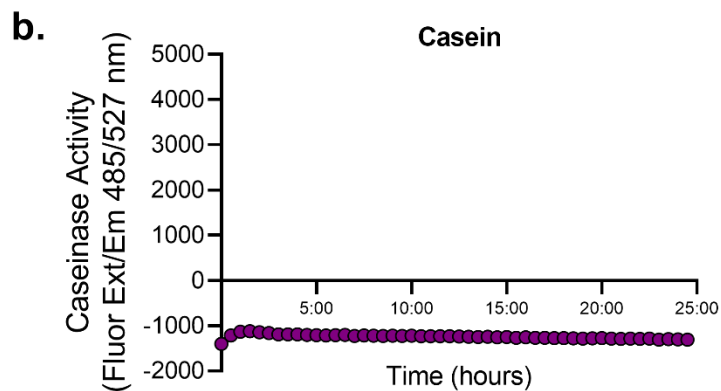

**Supplementary Figure 5. *Lactobacillus crispatus* does not degrade type I collagen or casein. (a)** Cell suspensions of *L. crispatus* at  $10^7$  or  $10^8$  CFU/reaction were incubated with fluorophore-conjugated type I collagen. Collagen degradation was measured by detecting the increase in fluorescence over a two-hour time course. Results are presented as mean  $\pm$  standard deviation from one independent experiment performed in technical quadruplicate. **(b)** Cell suspensions of *L. crispatus* at  $3 \times 10^6$  CFU/reaction were incubated with fluorophore-conjugated casein. Casein degradation was measured by detecting the increase in fluorescence over a 24-hour time course. Results are presented as mean  $\pm$  standard deviation from one independent experiment performed in technical triplicate.

a.

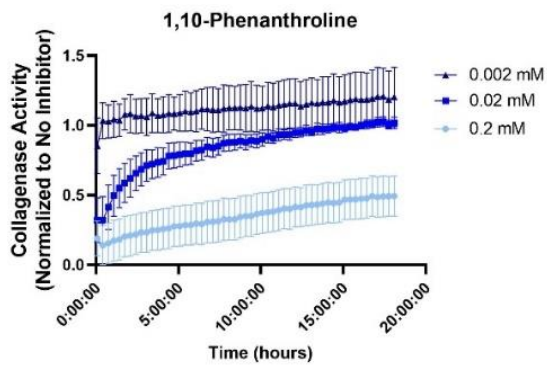

b.

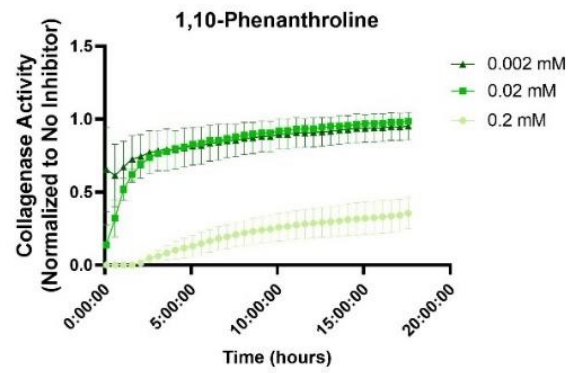

c.

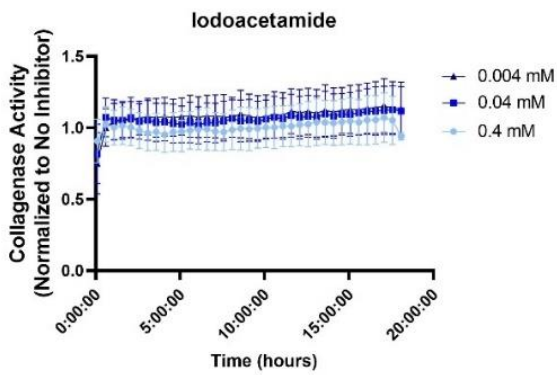

d.

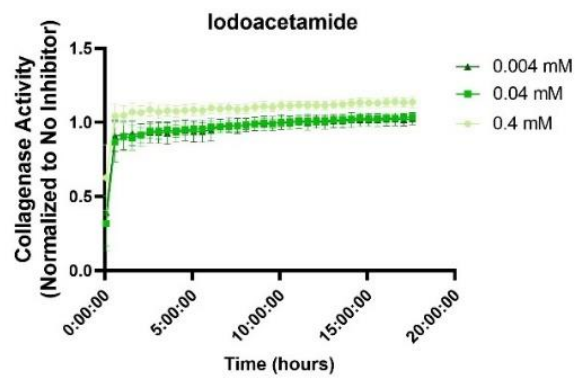

e.

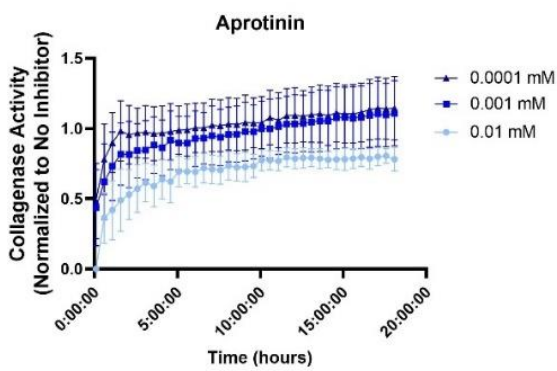

f.

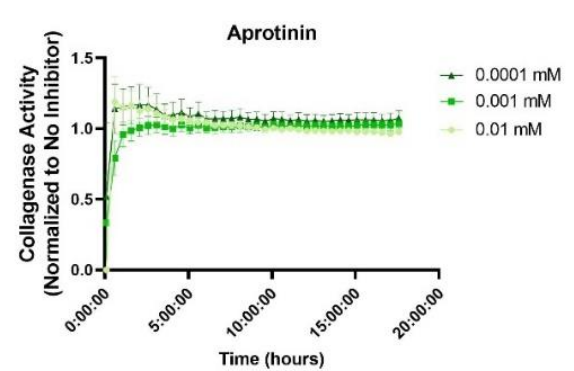

**Supplementary Figure 6. Dose response inhibition of *P. asaccharolytica* and *P. uenonis* type I collagenase activity with protease inhibitors.** Cell-free supernatants of (a,c,e) *P. asaccharolytica* (blue) or (b,d,f) *P. uenonis* (green) were incubated with fluorophore-conjugated type I collagen in the presence of three different doses of (a–b) the metalloprotease inhibitor 1,10-phenanthroline, (c–d) the cysteine protease inhibitor iodoacetamide, or (e–f) the serine protease inhibitor aprotinin. Collagen degradation was detected by measuring the increase in fluorescence over an 18-hour time course. Results are presented as a ratio normalized to the no inhibitor control and presented as mean  $\pm$  standard error from four independent experiments or two independent experiments (aprotinin 0.01 mM dose) performed in technical triplicate.

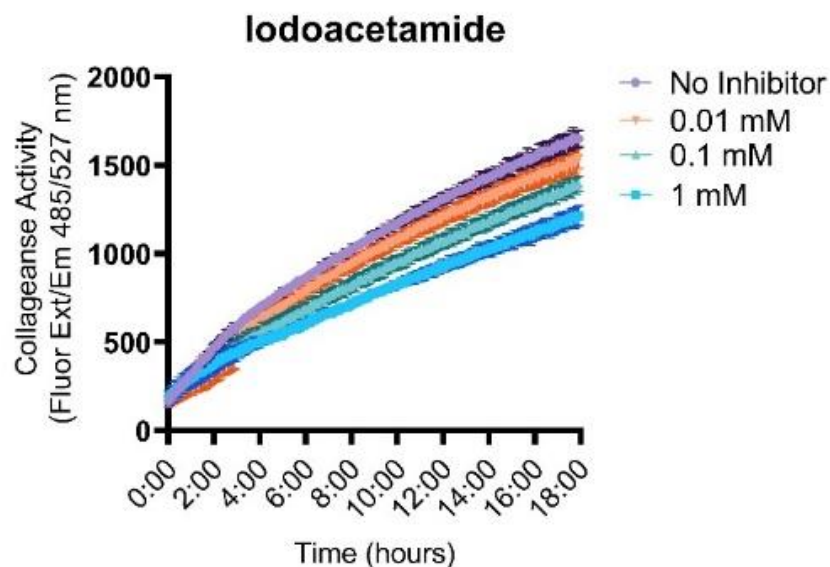

**Supplementary Figure 7. Dose-dependent inhibition of *P. asaccharolytica* type I collagenase activity with the cysteine protease inhibitor iodoacetamide.** *P. asaccharolytica* cell-free supernatant was incubated with fluorophore-conjugated type I collagen in the no inhibitor control or in presence of three different doses of the cysteine protease inhibitor iodoacetamide. Collagen degradation was measured by detecting the increase in fluorescence over an 18-hour time course. Results are presented as mean  $\pm$  standard deviation from one independent experiment.



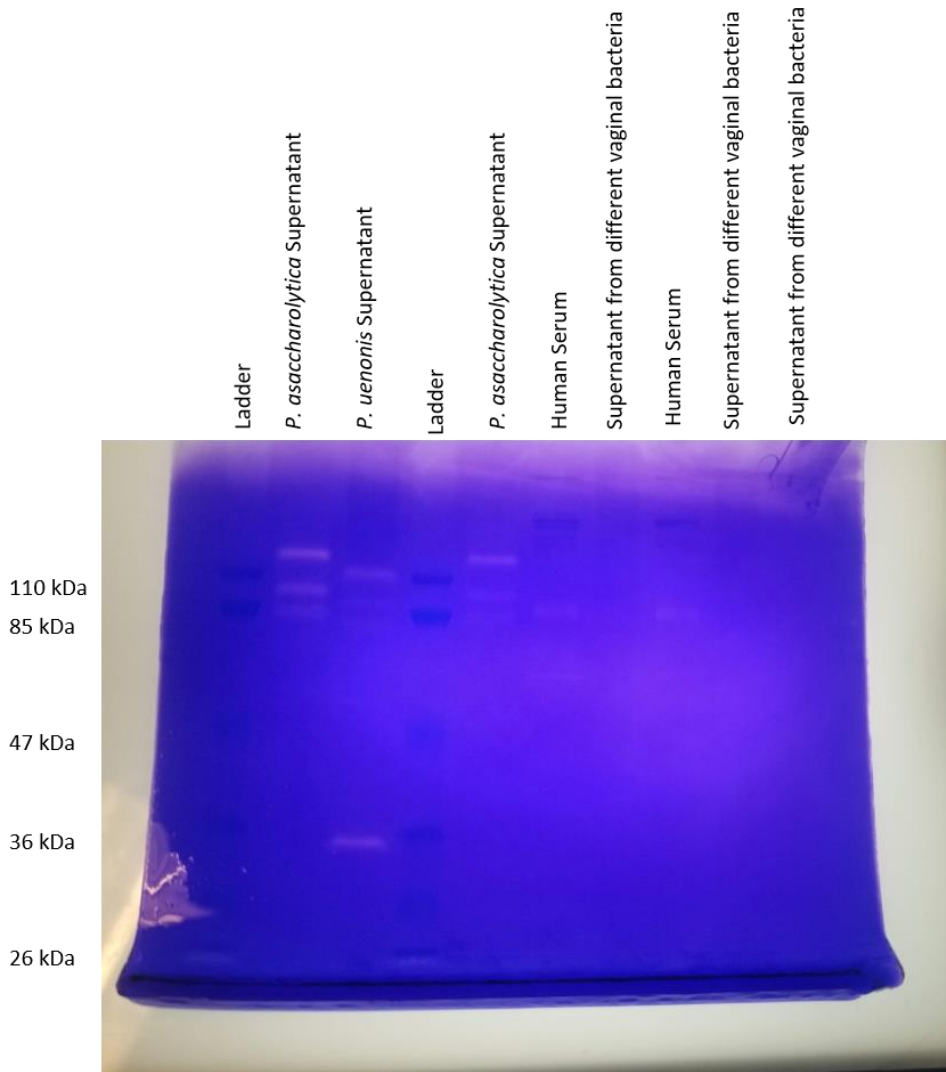

**Supplementary Figure 8.** Unprocessed, labelled non-denaturing SDS-PAGE gelatin (type I collagen) zymogram scan corresponding to the data presented in Supplementary Figure 2.

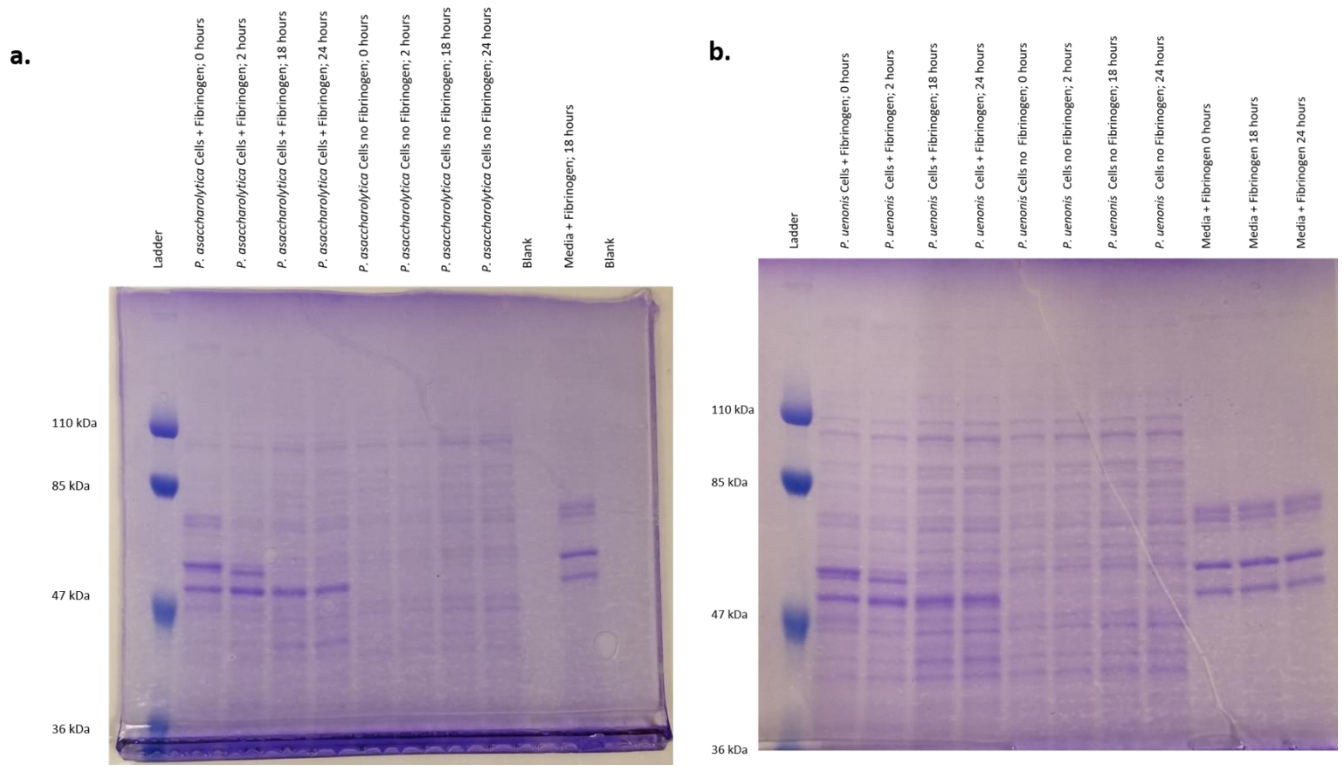

**Supplementary Figure 9.** Unprocessed, labelled SDS-PAGE gel scans corresponding to the data presented in **(a)** Figure 2a and **(b)** Figure 2b.

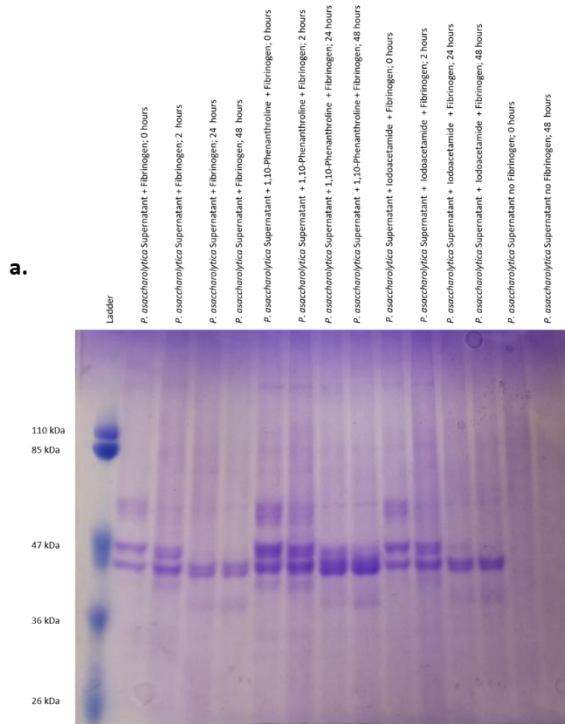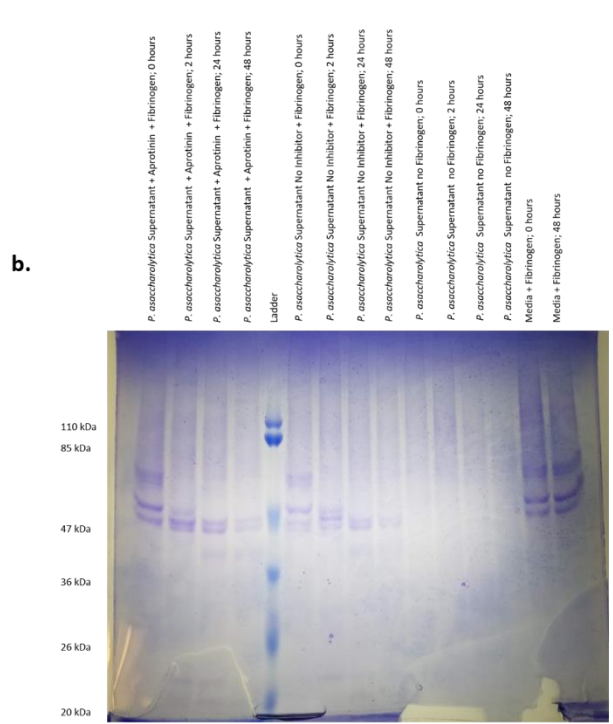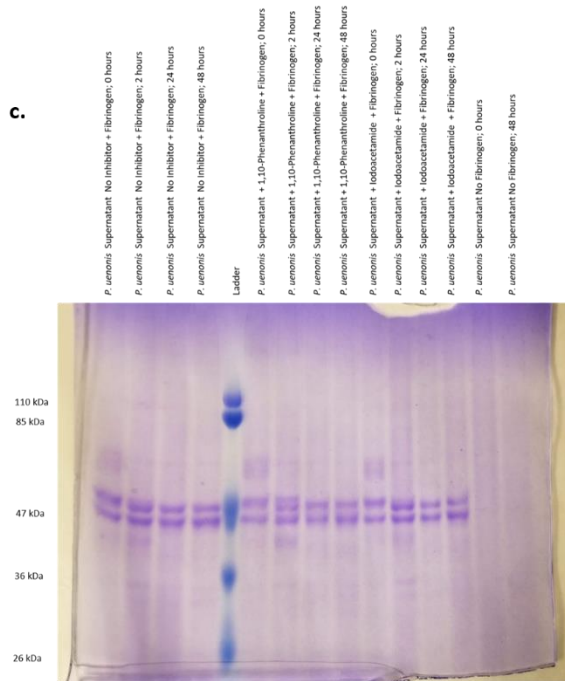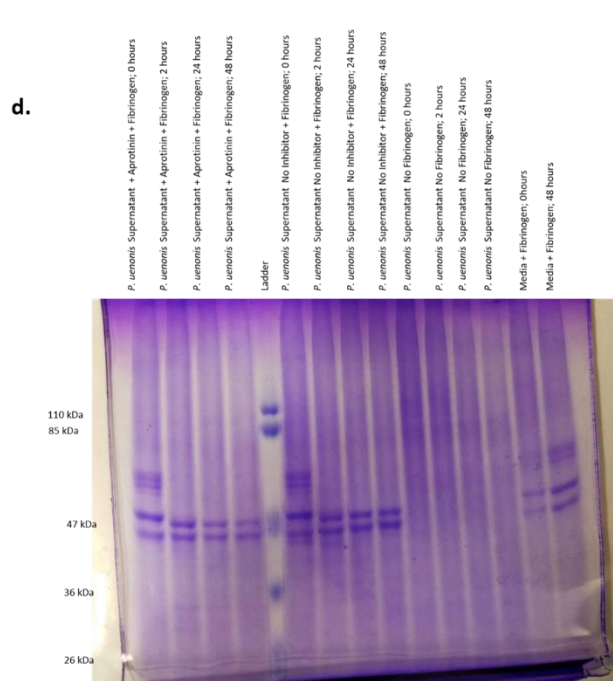

**Supplementary Figure 10.** Unprocessed, labelled SDS-PAGE gel scans corresponding to the data presented in (a,b) Figure 5a and (c,d) Figure 5b

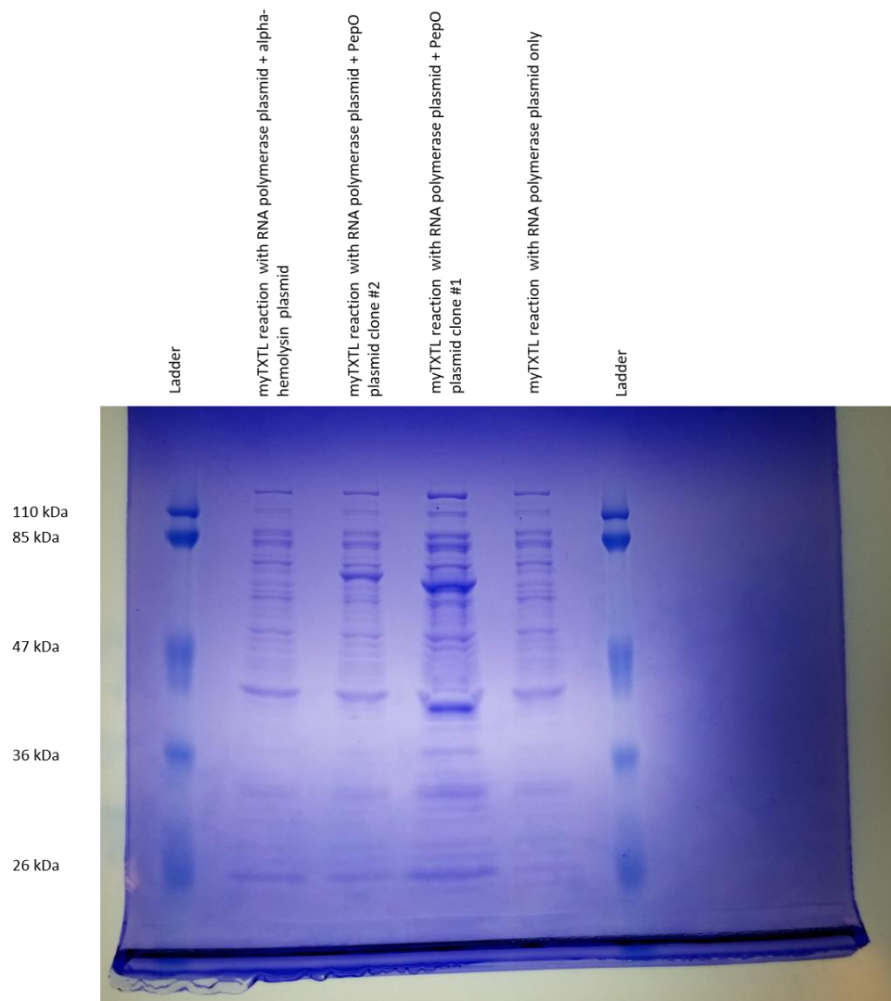

**Supplementary Figure 11.** Unprocessed, labelled SDS-PAGE gel scans corresponding to the data presented in Figure 7a.

## Supplementary Tables

**Supplementary Table 1. Type I collagenase activity of *Porphyromonas* species and *Lactobacillus crispatus* cell suspensions.**

|                           | 10 <sup>7</sup> CFU/reaction |                 |              |               | 10 <sup>8</sup> CFU/reaction |                 |             |               |
|---------------------------|------------------------------|-----------------|--------------|---------------|------------------------------|-----------------|-------------|---------------|
|                           | Max RFU                      | Time to Max RFU | Slope        | AUC*          | Max RFU                      | Time to Max RFU | Slope       | AUC*          |
| <i>P. asaccharolytica</i> | 2204.7 ± 1593.5              | 120 ± 0         | 1181 ± 119.1 | 2204 ± 207.7  | 5526 ± 628.2                 | 120 ± 0         | 2857 ± 55.1 | 6170 ± 91.1   |
| <i>P. uenonis</i>         | 2281 ± 168.7                 | 120 ± 0         | 1111 ± 10.2  | 2349 ± 17.7   | 7389 ± 515.8                 | 120 ± 0         | 3556 ± 62.7 | 9260 ± 86.74  |
| <i>P. gingivalis</i>      | 10418                        | 120 ± 0         | 4388 ± 439   | 15454 ± 746.3 | 18427                        | 120 ± 0         | 6030 ± 316  | 30981 ± 184.3 |
| <i>L. crispatus</i>       | -392                         | 0               | -12          | 0             | -201                         | 0               | -24         | 0             |

+Relative Fluorescence Units

\*Area under the curve

**Supplementary Table 2. Secreted collagenase and caseinase activity of *Porphyromonas* species.**

|                           | Type I Collagen |                 |            |                | Casein         |                 |              |               |
|---------------------------|-----------------|-----------------|------------|----------------|----------------|-----------------|--------------|---------------|
|                           | Max RFU         | Time to Max RFU | Slope      | AUC            | Max RFU        | Time to Max RFU | Slope        | AUC           |
| <i>P. asaccharolytica</i> | 2396.8 ± 1542.4 | 1091 ± 1.7      | 99.8 ± 9.5 | 30991 ± 1742   | 3442 ± 262.3   | 291 ± 1.9       | 424 ± 24.8   | 13717 ± 270.7 |
| <i>P. uenonis</i>         | 1059.5 ± 392.0  | 1093 ± 1.0      | 79.3 ± 2.8 | 15700 ± 552.4  | 3010.5 ± 204.5 | 291.3 ± 2.4     | 422.2 ± 21.9 | 11532 ± 209.3 |
| <i>P. gingivalis</i>      | 17024 ± 373     | 335 ± 62.6      | 89 ± 11    | 292886 ± 413.9 | 4153 ± 236.6   | 265 ± 17.3      | 283 ± 22     | 78127 ± 202.8 |

+Relative Fluorescence Units

\*Area under the curve

**Supplementary Table 3. Gingipain BLASTP hits in *P. uenonis* DSM 23387.**

| Gingipain Query | BLASTP Hits#                             | E-value  | % Sequence Identity | BLAST Hit Coverage (residues) | Subject Length |
|-----------------|------------------------------------------|----------|---------------------|-------------------------------|----------------|
| <b>RgpA</b>     | L215DRAFT_00128*<br>JCM13868DRAFT_01423+ | 1.00E-06 | 26%                 | 308-502                       | 1131           |
| <b>RgpB</b>     | N/A                                      | N/A      | N/A                 | N/A                           | N/A            |
| <b>Kgp</b>      | L215DRAFT_00128*<br>JCM13868DRAFT_01423+ | 3.00E-06 | 26%                 | 308-502                       | 1131           |
|                 | L215DRAFT_00230*<br>JCM13868DRAFT_00677+ | 2.00E-06 | 27%                 | 304-502                       | 1131           |

\*BLASTP hit in *P. uenonis* DSM23387 (IMG Genome ID 2528311143)

+BLASTP hit in *P. uenonis* DSM23387 (IMG Genome ID 2585427891)

#No BLASTP hits identified in *P. uenonis* 60-3

**Supplementary Table 4. *P. asaccharolytica* and *P. uenonis* proteins containing gingipain Pfams.**

| Pfam ID* | Pfam Description                                      | <i>P. asaccharolytica</i> |             | <i>P. uenonis</i>                                                 |                                             |            |
|----------|-------------------------------------------------------|---------------------------|-------------|-------------------------------------------------------------------|---------------------------------------------|------------|
|          |                                                       | CCUG 7834^                | PR426713P-I | CCUG 48615^<br>(IMG Genome ID<br>2528311143)                      | CCUG 48615<br>(IMG Genome ID<br>2585427891) | 60-3       |
| PF01364  | Peptidase family C25                                  | 2504824108#<br>Poras_0230 | 650259179#  | 2528766763#<br>L215DRAFT_00971                                    | 2587120245#                                 | 644453364# |
| PF03785  | Peptidase family C25,<br>C-terminal ig-like<br>domain | N/A                       | N/A         | N/A                                                               | N/A                                         | N/A        |
| PF08126  | Propeptide_C25                                        | N/A                       | N/A         | N/A                                                               | N/A                                         | N/A        |
| PF07675  | Cleaved Adhesin<br>Domain                             | N/A                       | N/A         | 2528765925#<br>L215DRAFT_00128;<br>2528766027#<br>L215DRAFT_00230 | 257119003#                                  | 258711974# |
| PF10365  | Domain of unknown<br>function (DUF2436)               | N/A                       | N/A         | N/A                                                               | N/A                                         | N/A        |
| PF18630* | Peptidase M60 C-<br>terminal domain                   | N/A                       | N/A         | N/A                                                               | N/A                                         | N/A        |

\*Pfam IDs from *P. gingivalis* gingipains, RgpA, RgpB, Kgp

\*Pfam only found in RgpB

#IMG/MER Gene IDs of pfam hit

^Type strains used in this study

**Supplementary Table 5. Reciprocal BLASTP search of *P. asaccharolytica* and *P. uenonis* gingipain hits against *P. gingivalis*.**

| Strain                                 | Query Gene ID/<br>Locus Tag    | Top<br>BLAST<br>Hits in <i>P.</i><br><i>gingivalis</i> | %<br>Identity | Query<br>Coverage | E-value      | Gene Name                                           | Function                                    |
|----------------------------------------|--------------------------------|--------------------------------------------------------|---------------|-------------------|--------------|-----------------------------------------------------|---------------------------------------------|
| <i>P. asaccharolytica</i><br>CCUG 7834 | 250482108;<br>Poras_0230       | PGN_0022                                               | 37%           | 97%               | 0            | PorU                                                | Type IX<br>secretion<br>system<br>peptidase |
| <i>P. uenonis</i><br>CCUG 48615        | 2528766763;<br>L215DRAFT_00971 | PGN_0022                                               | 36%           | 97%               | 0            | PorU                                                | Type IX<br>secretion<br>system<br>peptidase |
|                                        | 2528765925;<br>L215DRAFT_00128 | PGN_1611                                               | 28.89%        | 49%               | 9.00E-<br>41 | Leucine-Rich Repeat<br>domain-containing<br>protein | N/A                                         |
|                                        |                                | PGN_0852                                               | 29.11%        | 34%               | 9.00E-<br>36 | Immunoreactive 47 kDa<br>antigen                    | N/A                                         |
|                                        |                                | PGN_1733                                               | 27.10%        | 17%               | 2.00E-<br>09 | Choice-of-anchor J<br>domain-containing<br>protein  | N/A                                         |
|                                        |                                | PGN_1728                                               | 26.63%        | 17%               | 7.00E-<br>06 | Kgp; Lys-gingipain                                  | Gingipain                                   |
|                                        |                                | PGN_1155                                               | 24.14%        | 12%               | 1.00E-<br>04 | Choice-of-anchor J<br>domain-containing<br>protein  | N/A                                         |
|                                        | 2528766027;<br>L215DRAFT_00230 | PGN_1733                                               | 25.37%        | 33%               | 1.00E-<br>09 | Choice-of-anchor J<br>domain-containing<br>protein  | N/A                                         |
|                                        |                                | PGN_1155                                               | 23.71%        | 37%               | 9.00E-<br>07 | Choice-of-anchor J<br>domain-containing<br>protein  | N/A                                         |
|                                        |                                | PGN_0335                                               | 28.92%        | 13%               | 2.00E-<br>06 | PKD domain-containing<br>protein                    | N/A                                         |
|                                        |                                | PGN_1728                                               | 24.77%        | 37%               | 1.00E-<br>05 | Kgp; Lys-gingipain                                  | Gingipain                                   |



**Supplementary Table 6. Candidate collagenases in *P. uenonis* 60-3 and corresponding genes in *P. uenonis* CCUG 48615.**

| Accession ID<br>( <i>P. uenonis</i> 60-3) | <i>P. uenonis</i><br>CCUG 48615* | Percent<br>Identity | Protein Name                                              | Protease<br>Type | All Feature IDs in <i>P. uenonis</i> 60-3 | Differences in<br>Collagenase<br>Feature IDs^          |
|-------------------------------------------|----------------------------------|---------------------|-----------------------------------------------------------|------------------|-------------------------------------------|--------------------------------------------------------|
| PORUE0001_148<br>4                        | L215DRAFT_0093<br>9              | 52%                 | Peptidase S1 domain-<br>containing protein                | Serine           | IPR13783; IPR026444; TIGR0483             | N/A                                                    |
| PORUE0001_073<br>1                        | L215DRAFT_0110<br>9              | 72%                 | Trypsin                                                   | Serine           | IPR13783; IPR026444; TIGR0483;<br>SF49265 | IPR036116 (Fn-3<br>domain); SF49265;<br>(Fn3 type III) |
| PORUE0001_136<br>6                        | L215DRAFT_0108<br>0              | 98%                 | Peptidase, S9A/B/C<br>family, catalytic<br>domain protein | Serine           | SSF53474                                  | N/A                                                    |
| PORUE0001_028<br>1                        | L215DRAFT_0007<br>6              | 91%                 | Peptidase family M13                                      | Metallo          | IPR024079                                 | N/A                                                    |
| PORUE0001_056<br>8                        | L215DRAFT_0007<br>6              | 93%                 | Peptidase family M13                                      | Metallo          | IPR024079                                 | N/A                                                    |
| PORUE0001_045<br>1                        | L215DRAFT_0009<br>9              | 95%                 | Putative thiol<br>protease/hemagglutini<br>n              | Cysteine         | IPR026444; TIGR0483                       | N/A                                                    |
| PORUE0001_136<br>3                        | L215DRAFT_0108<br>3              | 93%                 | Putative thiol<br>protease/hemagglutini<br>n              | Cysteine         | IPR026444; TIGR0483                       | N/A                                                    |
| PORUE0001_116<br>9                        | L215DRAFT_0135<br>4              | 97%                 | Peptidase, S9A/B/C<br>family, catalytic<br>domain protein | Serine           | IPR029058                                 | N/A                                                    |
| PORUE0001_113<br>0                        | L215DRAFT_0154<br>0              | 97%                 | Peptidase, U32 family                                     | Unknown<br>(U32) | PF01136; PF12392                          | N/A                                                    |
| PORUE0001_032<br>9                        | L215DRAFT_0022<br>8              | 98.80%              | Peptidase, U32 family                                     | Unknown<br>(U32) | PF01136                                   | N/A                                                    |

\*Top BLASTP hit

^Present in *P. uenonis* 60-3 only

**Supplementary Table 7. Intrastrain and interstrain identity of *Porphyromonas* candidate collagenases.**

| Protease Type                        | <i>P. asaccharolytica</i> DSM 20707 |                                   | <i>P. uenonis</i> DSM 23387 |                                   | Interspecies Identity <sup>1</sup> |
|--------------------------------------|-------------------------------------|-----------------------------------|-----------------------------|-----------------------------------|------------------------------------|
|                                      | Gene                                | Intrastrain Identity <sup>1</sup> | Gene <sup>2</sup>           | Intrastrain Identity <sup>1</sup> |                                    |
| <b>Ig-containing Serine Protease</b> | Poras_1474                          | 45.1%                             | Poru_01109                  | 35.2%                             | 77.5%                              |
|                                      | Poras_0168                          |                                   | Poru_00939                  |                                   | 55.6%                              |
| <b>M13 Metalloprotease</b>           | Poras_0079                          | N/A                               | Poru_00076                  | N/A                               | 92.7%                              |
| <b>C10 Protease</b>                  | Poras_1659                          | 31.3%                             | Poru_01083                  | 28.8%                             | 67.2%                              |
|                                      | Poras_0891                          |                                   | Poru_00099                  |                                   | 72.8%                              |
| <b>U32 Collagenase</b>               | Poras_0217                          | 29.3%                             | Poru_01540                  | 29.0%                             | 90.6%                              |
|                                      | Poras_0873                          |                                   | Poru_00228                  |                                   | 97.3%                              |

<sup>1</sup>Amino acid identities determined using Clustal Omega multiple sequence alignments

<sup>2</sup>Locus tags correspond to L215DRAFT\_XXXXX
